# Supplementary material for: Karyotype Characterization of In Vivo- and In Vitro-Derived Porcine Parthenogenetic Cell Lines
Source: PLoS One. 2014 May 20;9(5):e97974. doi: 10.1371/journal.pone.0097974 (PMC4028241; doi:10.1371/journal.pone.0097974)
Supplement: Table S1 — The detailed information of porcine parthenogenetic fetuses. (XLS) [file pone.0097974.s003.xls]

## Sheet: Sheet1
The detailed information of porcine parthenogenetic fetuses
cell lines	fetus size			cell lines	fetus size			cell lines	fetus size
pPEF1-1	3mm	H.E. stain		pPEF2-1	8mm	H.E. stain		pPEF3-1	22mm	cell culture
pPEF1-2	4mm	H.E. stain		pPEF2-2	24mm	H.E. stain		pPEF3-2	18mm	cell culture
pPEF1-3	5mm	H.E. stain		pPEF2-3	4mm	cell culture		pPEF3-3	18mm	cell culture
pPEF1-4	3mm	H.E. stain		pPEF2-4	19mm	cell culture		pPEF3-4	23mm	cell culture
pPEF1-5	2mm	H.E. stain		pPEF2-5	22mm	cell culture		pPEF3-5	17mm	cell culture
pPEF1-6	3mm	H.E. stain		pPEF2-6	16mm	cell culture		pPEF3-6	19mm	cell culture
pPEF1-7	7mm	cell culture		pPEF2-7	8mm	cell culture		pPEF3-7	8mm	cell culture
pPEF1-8	3mm	cell culture		pPEF2-8	21mm	cell culture		pPEF3-8	18mm	cell culture
pPEF1-9	4mm	cell culture		pPEF2-9	9mm	cell culture		pPEF3-9	7mm	cell culture
pPEF1-10	9mm	cell culture		pPEF2-10	22mm	cell culture		pPEF3-10	19mm	cell culture
pPEF1-11	3mm	cell culture		pPEF2-11	19mm	cell culture		pPEF3-11	4mm	cell culture
pPEF1-12	3.5mm	cell culture		pPEF2-12	20mm	cell culture		pPEF3-12	6mm	cell culture
pPEF1-13	3.5mm	cell culture		pPEF2-13	5mm	cell culture		pPEF3-13	3mm	cell culture
pPEF1-14	5mm	cell culture		pPEF2-14	7mm	cell culture		pPEF3-14	5mm	cell culture
pPEF1-15	8mm	cell culture		pPEF2-15	12mm	cell culture
pPEF1-16	3mm	cell culture		pPEF2-16	14mm	cell culture
pPEF1-17	3mm	cell culture		pPEF2-17	5mm	cell culture
				pPEF2-18	14mm	cell culture
				pPEF2-19	3mm	cell culture
